# Supplementary material for: Nanoparticle-Mediated Angiotensin-(1-9) Drug Delivery for the Treatment of Cardiac Hypertrophy
Source: MDPI journal article supplement (doi:10.3390/pharmaceutics13060822), 2021-06-01
Supplement: s1 [file s1]

# Supplementary Materials: Nanoparticle-Mediated Angiotensin-(1-9) Drug Delivery for the Treatment of Cardiac Hypertrophy

Sabrina Sepúlveda-Rivas, Matías S. Leal, Zully Pedrozo, Marcelo J. Kogan, María Paz Ocaranza and Javier O. Morales

## 1. AuNS Physicochemical Characterization

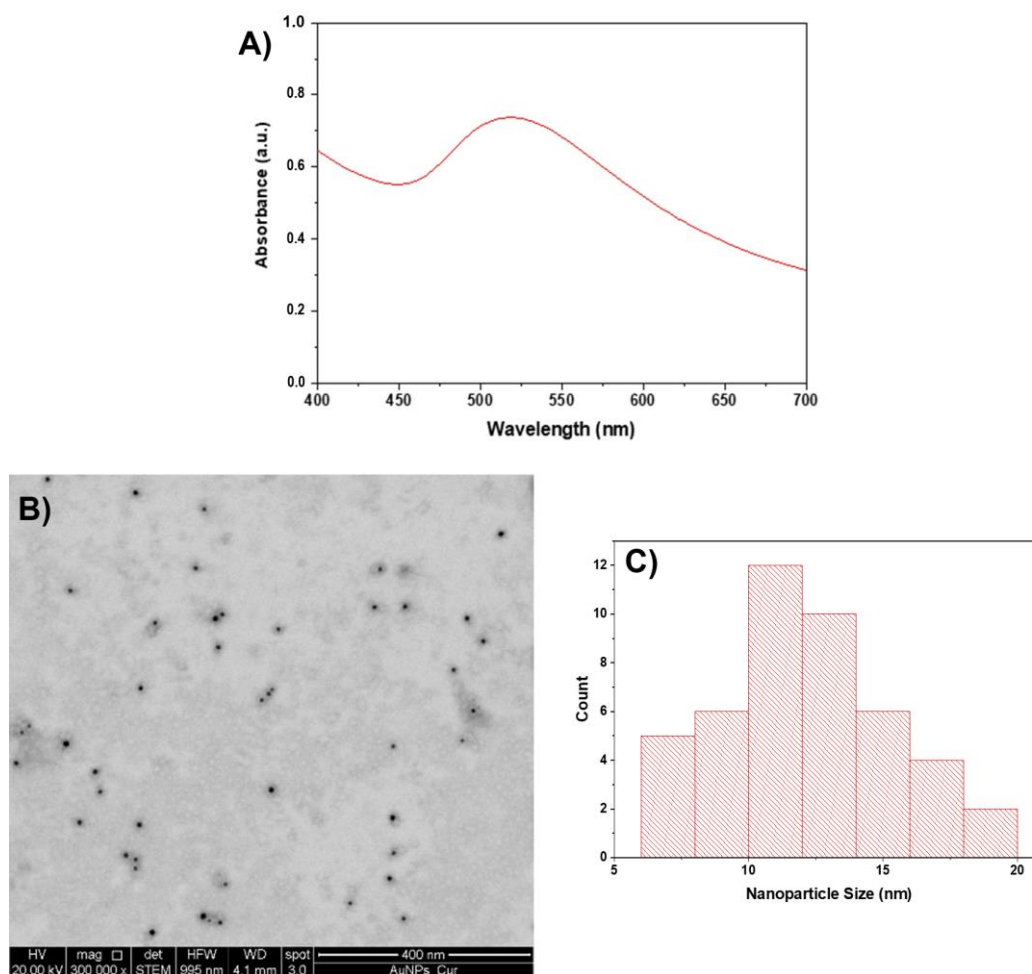

**Figure S1.** Characterization of the AuNS. (A) UV-Vis absorption spectrum of AuNS; (B) TEM photomicrograph of AuNS with an (C) insert of its size distribution.

## 2. Cytotoxicity of Ang-(1-9) in Primary Culture of Cardiomyocyte by Flow Cytometry

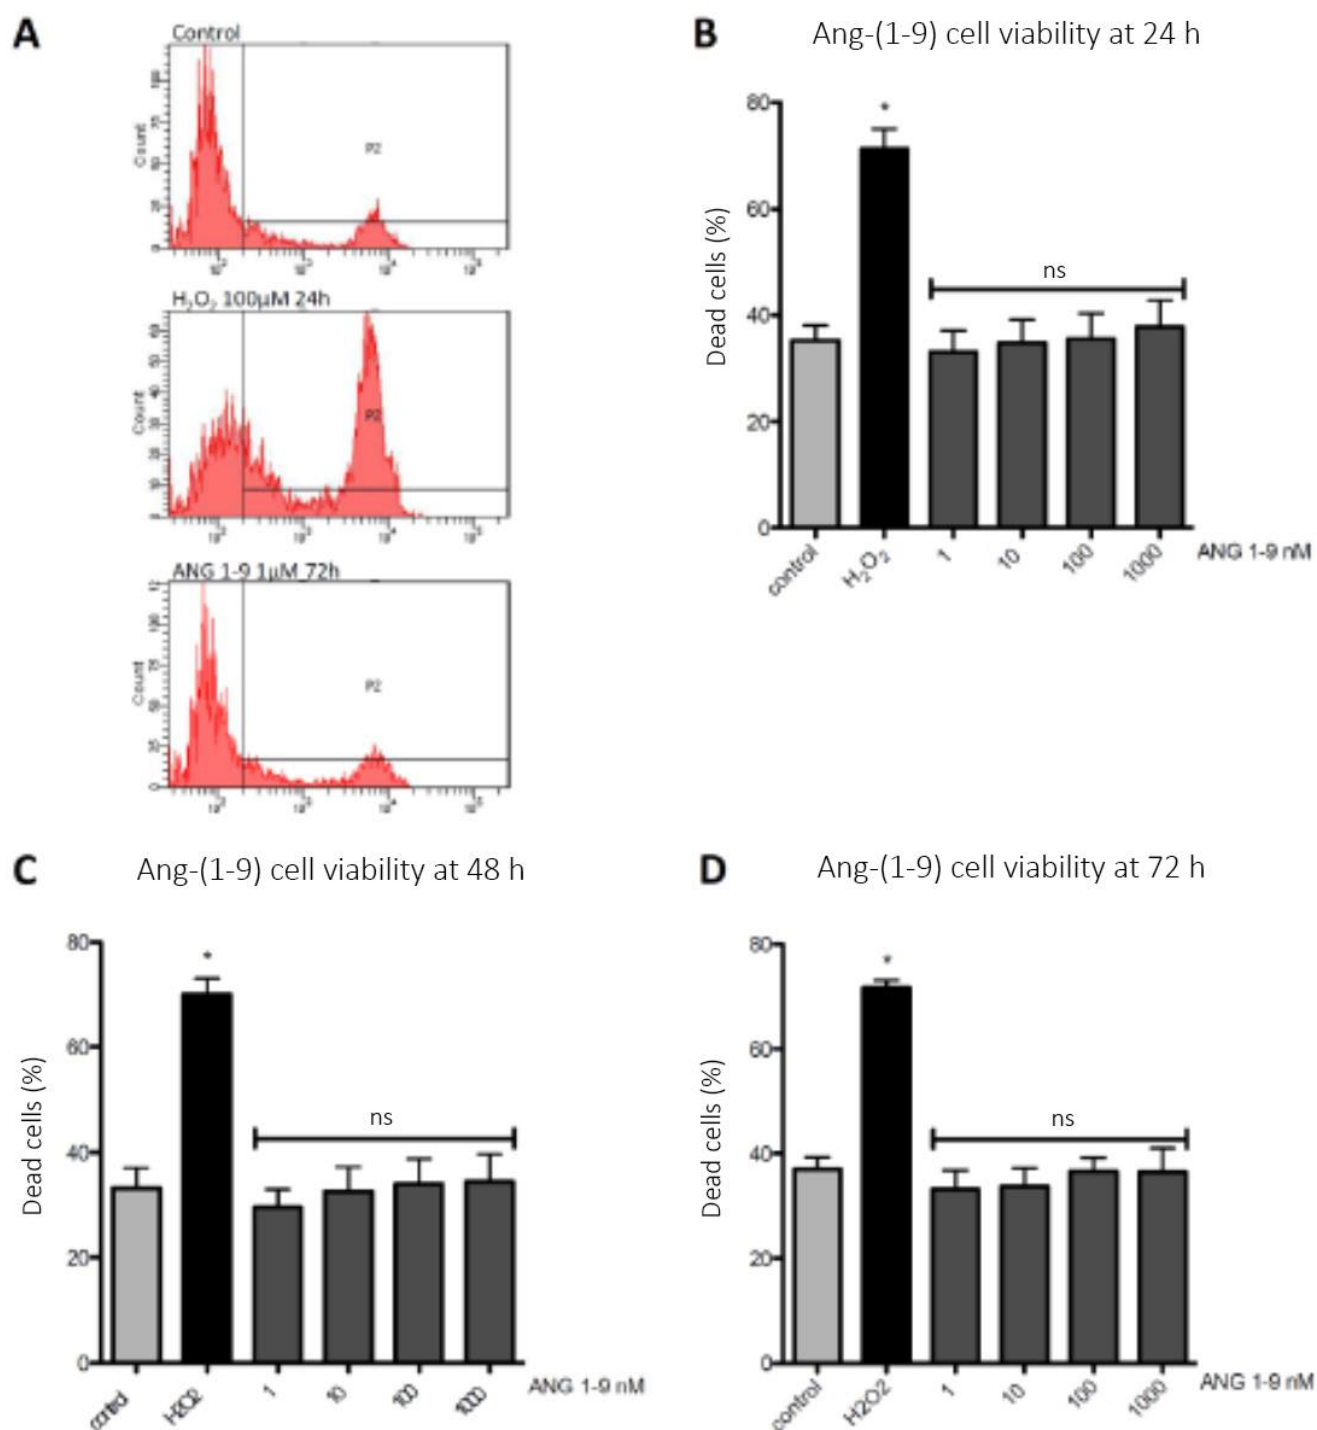

**Figure S2.** (A) Representative histograms of PI incorporation measurement by flow cytometry. The viability of cardiomyocytes incubated with Ang-(1-9) at concentrations 0, 1, 10, 100 nM, and 1  $\mu$ M was determined, during (B) 24 h, (C) 48 h, and (D) 72 h, the data correspond to the mean  $\pm$  SEM of five independent experiments. One-way ANOVA analysis, with Dunnett's post-test. \*  $p < 0.05$  ns = not significant.

### 3. Cellular Viability Assays: MTS

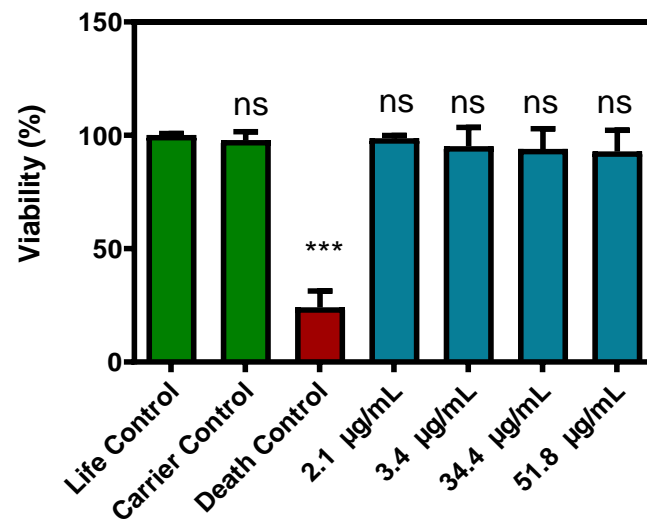

**Figure S3.** Viability expressed as a percentage of cell viability of neonatal rat cardiomyocytes treated with different concentrations of EE/Alg pNPs compared to the culture medium control. Life control: DMEM/10% FBS, cell death: 10% SDS, vehicle: Milli-Q water, gold nanospheres: 2% AuNS and kept at 37 °C and 5% CO<sub>2</sub> for 1 h. The data represent mean values  $\pm$  SD ( $n = 3$ ), \*\*\* $p < 0.001$ , ns = not statistically significant with respect to the life control of ANOVA-Dunnett's.
